# Supplementary material for: A Dual-Function “TRE-Lox” System for Genetic Deletion or Reversible, Titratable, and Near-Complete Downregulation of Cathepsin D
Source: MDPI journal article supplement (doi:10.3390/ijms24076745), 2023-04-04
Supplement: s1 [file s1]

Supplemental Materials  
for

# A Dual-Function "TRE-Lox" System for Genetic Deletion or Reversible, Titratable, and Near-Complete Downregulation of Cathepsin D

Heather M. Terron<sup>1</sup>, Derek S. Maranan<sup>1,2</sup>, Luke A. Burgard<sup>1,2</sup>, Frank M. LaFerla<sup>1,2</sup>, Shelley Lane<sup>1</sup> and Malcolm A. Leissring<sup>1,\*</sup>

<sup>1</sup> Institute for Memory Impairments and Neurological Disorders, University of California, Irvine, Irvine, CA 92697, USA

<sup>2</sup> Department of Neurobiology and Behavior, University of California, Irvine, Irvine, CA 92697, USA

\* Correspondence: m.leissring@uci.edu

## Contents

| pp. | Fig./Table | Title                                                                                                                                           |
|-----|------------|-------------------------------------------------------------------------------------------------------------------------------------------------|
| 2   | Fig. S1    | Targeted region of murine <i>CTSD</i> gene highlighting key elements.                                                                           |
| 3-4 | Fig. S2    | Targeted region after insertion of TRE-Lox KI insert with Puro <sup>r</sup> cassette.                                                           |
| 5   | Fig. S3    | Targeted region after Flp recombination.                                                                                                        |
| 6   | Fig. S4    | Targeted region after genetic deletion (recombination w/ Flp and Cre).                                                                          |
| 7   | Fig. S5    | Genotyping of TL1C8 line by sequencing.                                                                                                         |
| 8   | Fig. S6    | PCR verification before vs. after Flp-mediated recombination.                                                                                   |
| 9   | Fig. S7    | Dox dose-response curves for stable clones TFR1B11 and TFR2E9.                                                                                  |
| 10  | Fig. S8    | Time courses of CatD downregulation in clones TFR1B11 and TFR2E9 after addition of Dox (100 ng/mL).                                             |
| 11  | Fig. S9    | Effect of rtTR on CatD activity in the presence and absence of Dox (1000 ng/mL) in transient pools and stable clones of TL1C8-Flp cells.        |
| 12  | Fig. S10   | Steady-state CatD protein levels in MEFs vs. TFR1D7 cells and in response to Dox addition and withdrawal, using CatD-KO line C1C5 as a control. |
| 13  | Table S1   | Primers used in this study.                                                                                                                     |

## Supplementary Figure S1. Targeted region of murine *CTSD* gene highlighting key elements.

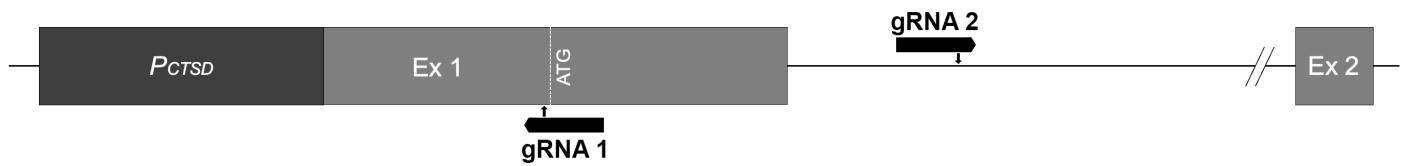

|                    |                                                                 |
|--------------------|-----------------------------------------------------------------|
| Promoter:          | lower-case gray                                                 |
| TATA Box:          | <u>underlined</u>                                               |
| Transcript. start: | ↗                                                               |
| EXON 1:            | UPPER-CASE BLACK                                                |
| Introns:           | lower-case black                                                |
| ATG site:          | <span style="border: 1px solid black;">OUTLINED</span>          |
| gRNA seqs:         | <b>BOLD BLACK</b>                                               |
| gRNA orientation:  | horizontal arrows                                               |
| PAM seqs:          | <span style="background-color: yellow;">Yellow highlight</span> |
| Cut site:          | ↑↑                                                              |

...accggttgagggccaaacaagcgggtcagctgactccgcgggactgc

↗

ggcgatcatcctgcctATAAGCCGGCGACCTCTGGCTTTAAGCTTTGCTCT

CTTCGGGCCG**CCGCGACCA**ATGAAGACTCCCGGCGTCTTGCTGCTCATTCT

←-----↑↑----->

CGGCCTCCTGGCTTCGTCCTCCTTCGCGATTATCAGgtgaggaccgctc

-----↓----->

tgggtccggagatgcgggggctcgtc**acctggagtgccgcgtgctc**cggcc

gtgctggaatgcacctgtgcacccagcgcagccttctcaggggtccc...

## Supplementary Figure S2. Targeted region after insertion of TRE-Lox KI insert with Puro<sup>r</sup> cassette.

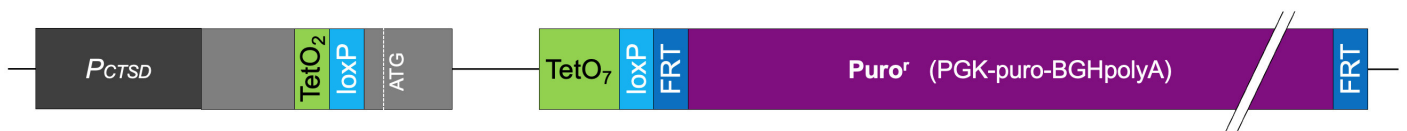

Flanking seq: gray text  
 Homology Arms: *purple italic*  
 TATA Box: underlined  
 EXONS: UPPER CASE  
 Introns: lower case black  
 KI region: **bold**  
 ATG sites: OUTLINED  
 Stop codons: **black box**  
 Spacer seqs: gray highlight  
 TetO repeats: green highlight  
 LoxP sites: light blue highlight  
 FRT sites: blue highlight  
 PGK-Puro<sup>r</sup>-pA: violet highlight

```

...gttcggggtcgccccgccccctcgcccgcggtctcacgtgacccggttgag
ggccaaacaagcgggtcagctgactccgcgggactgcggcggtcatcctgc
ctATAAGCCGGCGACCTCTGGCTTTAAGCTTTGCTCTCTTCGGGCCGCCG
CAAGCAGAGCTCTCCCTATCAGTGATAGAGATCTCCCTATCAGTGATAGA
GATCGTCGATAACTTCGTATAAAGTATCCTATACGAAGTTATAGCCGCGA
CCATGAAGACTCCCGGCGTCTTGCTGCTCATTCTCGGCCTCCTGGCTTCG
TCCTCCTTCGCGATTATCAGgtgaggaccgctctgggtccggagatgcg
gggctcgtcacctggagtgccgcgtcttcactcgagtttactccctatca
gtgatagagaacgtatgaagagtttactccctatcagtgatagagaacgt
atgcagactttactccctatcagtgatagagaacgtataaggagtttact
ccctatcagtgatagagaacgtatgaccagtttactccctatcagtgata
gagaacgtatctacagtttactccctatcagtgatagagaacgtatatcc
agtttactccctatcagtgatagagaacgtatgtagaggtagataacttc
gtataaagtatcctatacgaagttatgtagtaataactagtcgaagttcc
tattctctagaaagtataggaacttcagggtctgaagaggagtttacgtcc
agccaagctagcttggctgcaggtcgtcgaaattctaccgggtaggggag
gcgcttttcccaaggcagtcctggagcatgcgcttttagcagccccgctggg
cacttggcgctacacaagtggcctctggcctcgcacacattccacatcca
ccggtaggcgccaaccggctccgttctttggtggcccccttcgcgccacct
  
```

**Supplementary Figure S2. Targeted region after insertion of TRE-Lox KI insert with Puro<sup>r</sup> cassette (cont'd).**

tctactcctcccctagtcaggaagttcccccccgccccgcagctcgcgctc  
gtgcaggacgtgacaaatggaagtagcacgtctcactagtctcgtgcaga  
tggacagcaccgctgagcaatggaagcgggtaggcctttggggcagcggc  
caatagcagcttttgctccttcgcttttctgggctcagaggctgggaagggg  
tgggtccggggggcggggcgggcgccccgaaggctcctccggaggccccggcat  
tctgcacgcttcaaaagcgcacgtctgccgcgctgtttctcctcttcctca  
tctccgggccttttcgacctgcagcctgttgacaattaatcatcggcatag  
tatatcggcatagttataatacgacaagggtgaggaactaaacctgaccga  
gtacaagcccacggtgcgcctcgcaccccgcgacgacgtccccaggggccg  
tacgcaccctcgcgcgcgcgttcgcgcgactaccccgccacgcgcacacc  
gtcgatccggaccgccacatcgagcgggtcaccgagctgcaagaactctt  
cctcacgcgcgtcgggctcgacatcggcaagggtgtgggtcgcggacgacg  
gcgcgcggtggcggtcttgaccacgcgcggagagcgtcgaagcggggggcg  
gtgttcgcgcgagatcggccccgcgcgttgcccgagttgagcgggttccccggct  
ggccgcgcagcaacagatggaaggcctcctggcgccgcaccggcccccaagg  
agccccgcgtgggttcctggccaccgctcggcgtctcgcgccgaccaccagggc  
aagggtctgggcagcgcgcgtcgtgctccccggagtggaggcggccgagcgc  
cgccgggggtgcccgccttccttgagacctccgcgcccccgcaacctccccct  
tctacgagcgggtcgggttcaccgtcaccgcccgcgctcgagggtgcccgaa  
ggaccgcgcacctgggtgcatgaccgcgaagcccggtgcctgaggggatca  
attctctagagctcgcgtgatcagcctcgactgtgccttctagttgccagc  
catctgttggttgccccctcccccgctgccttccttgaccctggaagggtgcc  
actcccactgtccttttcctaataaaaatgaggaaattgcatcgcattgtct  
gagtaggtgtcattctattcttggggggtgggggtggggcaggacagcaagg  
gggaggattgggaagacaatagcaggcatgctggggatgcgggtgggctct  
atggcttctgaggcggaaagaaccagctggggctcgactagagcttgccgg  
aacccttcgaagttcctattctctagaaagtataggaacttcggcgcgcc  
atttcgggccgtgctggaatgcacctgtgcacccagcgcagccttcctcag  
ggtcaccacagactatggggcgagacactcaaaaggcaggggtctcctggg  
ccccctctccactcctatgactcctatgggtcgaacaggagggtacagt...

## Supplementary Figure S3. Targeted region after Flp recombination to remove Puro<sup>r</sup> cassette.

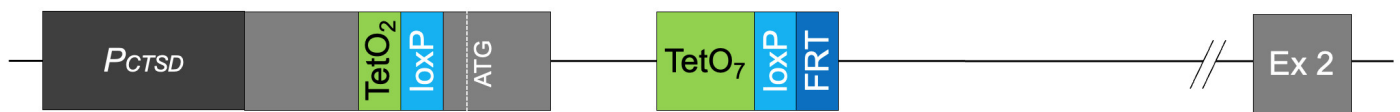

Flanking seq: gray text  
 Homology Arms: purple italic  
 TATA Box: underlined  
 EXONS: UPPER CASE  
 Introns: lower case black  
 KI region: **bold**  
 ATG sites: OUTLINED  
 Stop codons: black box  
 Spacer seqs: gray highlight  
 TetO repeats: green highlight  
 LoxP sites: light blue highlight  
 FRT sites: blue highlight

...gttcgggtcgccccgccccctcgcccgcggtctcacgtgacccggttgag  
 ggccaaacaagcgggtcagctgactccgcgggactgcggcggtcatcctgc  
 ctATAAGCCGGCGACCTCTGGCTTTAAGCTTTGCTCTCTTCGGGCGCCG  
 CAAGCAGAGCTCTCCCTATCAGTGATAGAGATCTCCCTATCAGTGATAGA  
 GATCGTCGATAACTTCGTATAAAGTATCCTATACGAAGTTATAGCCGCGA  
 CCATGAAGACTCCCGGCGTCTTGCTGCTCATTCTCGGCCTCCTGGCTTCG  
 TCCTCCTTCGCGATTATCAGgtgaggaccgctctgggtccggagatgcg  
 gggctcgtcacctggagtgcgcggtcttcactcgagtttactccctatca  
 gtgatagagaacgtatgaagagtttactccctatcagtgatagagaacgt  
 atgcagactttactccctatcagtgatagagaacgtataaggagtttact  
 ccctatcagtgatagagaacgtatgaccagtttactccctatcagtgata  
 gagaacgtatctacagtttactccctatcagtgatagagaacgtatatcc  
 agtttactccctatcagtgatagagaacgtatgtcgaggtagataacttc  
 gtataaagtatcctatacgaagttatgtagtaataactagtcgaagttcc  
 tattctctagaaagtataggaacttcgaagttcctattctctagaaagta  
 taggaacttcggcgcgccatttcggccggtgctggaatgcacctgtgcacc  
 cagcgcagccttcctcaggggtcccacagactatggggcgagacactcaaa  
 aggcaggggtctcctgggccccctctccactcctatgactcctatgggtcga  
 acaggagggtacagt...

## Supplementary Figure S4. Targeted region after genetic deletion (recombination w/ Flp and Cre).

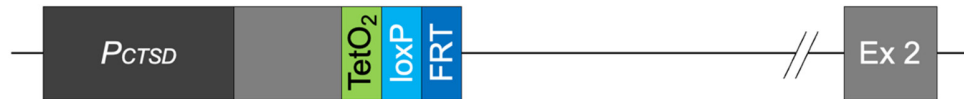

Flanking seq: gray  
 Homology Arms: *purple italic*  
 TATA Box: underlined  
 KI region: **bold black**  
 ATG sites: OUTLINED UPPER CASE  
 Stop codons: black box  
 Spacer seqs: gray highlight  
 TetO repeats: green highlight  
 LoxP site: light blue highlight  
 FRT site: blue highlight

...gttcgggtcgccccgcccctcgcccgcggtctcacgtgaccggttgag  
 ggccaaacaagcgggtcagctgactccgcgggactgcggcggtcatcctgc  
 ct~~ataagccggcgac~~ctctggctttaagctttgctctcttcgggcccgcg  
 cgggtggaattgctc~~tccctatcagtgatagagatc~~~~tccctatcagtgata~~  
~~gagatcg~~tcgataacttcgtataaagtatcctatacgaagttatgtagta  
 ataactagtcgaagttcctattctctagaaagtataggaacttcggcgcg  
 ccatttctccggccgtgctggaatgcacctgtgcacccagcgcagccttc  
 ctcagggtcccacagactatggggcgagacactcaaaaggcaggggtctc  
 ctgggcccctctccactcctatgactcctatggtcgaacaggagggt...

# Supplementary Figure S5. Genotyping of TL1C8 line by sequencing.

## a. Alignment of sequencing of upper, TRE-Lox KI PCR amplicon from TL1C8

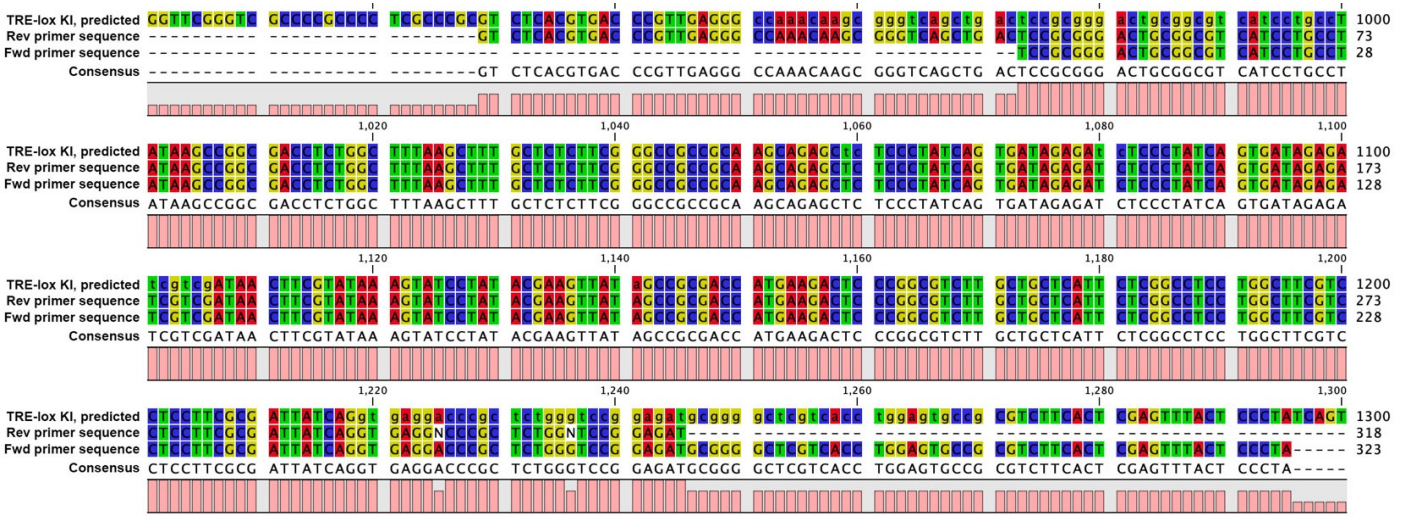

## b. Alignment of sequencing of lower, NHEJ PCR amplicon from TL1C8 with WT sequence.

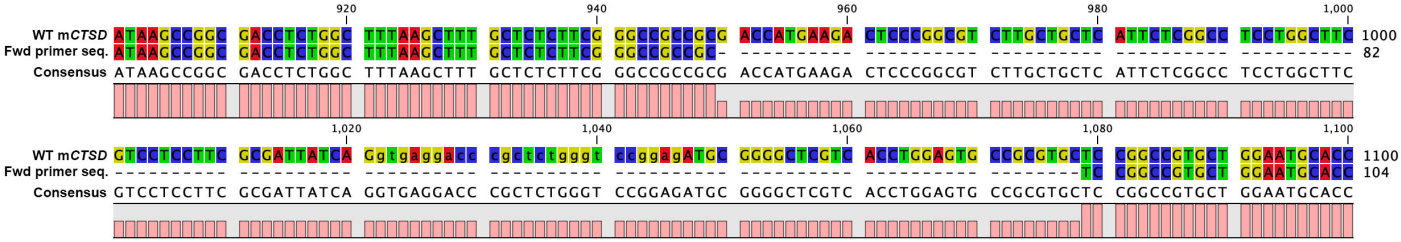

## c. Alignment of sequencing of lower, NHEJ PCR amplicon from TL1C8 with predicted NHEJ sequence.

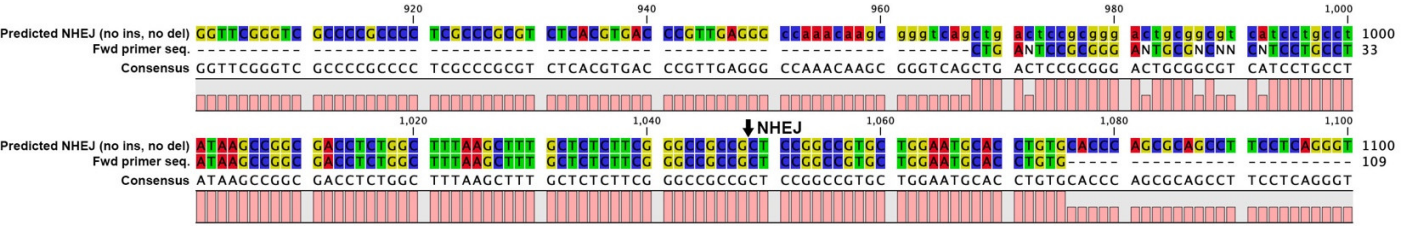

## d. Sanger sequencing of lower, NHEJ PCR amplicon from TL1C8 stable clone.

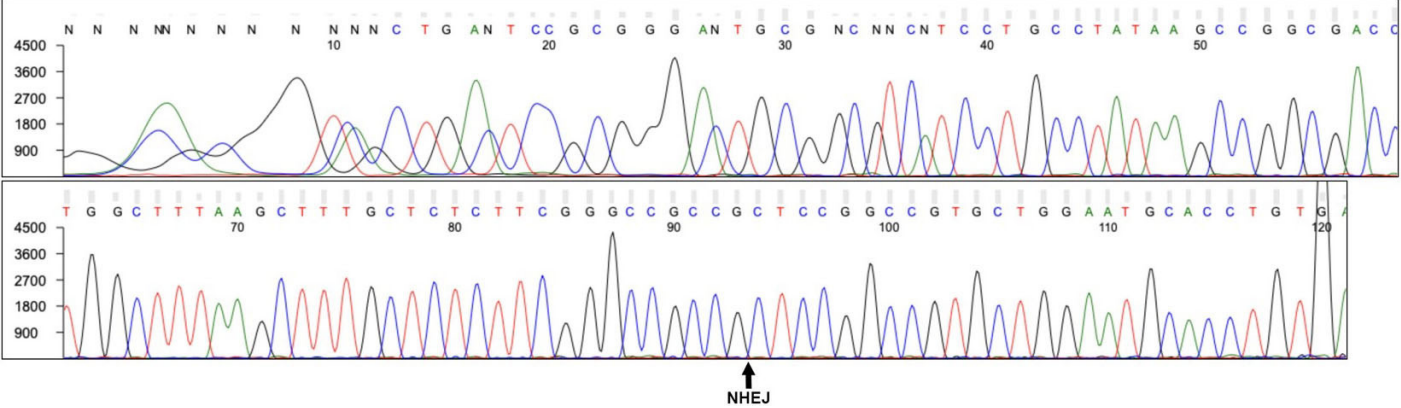



## Supplementary Figure S6. PCR verification before vs. after Flp-mediated recombination.

**a**

**Before-Flp TRE-lox KI allele**

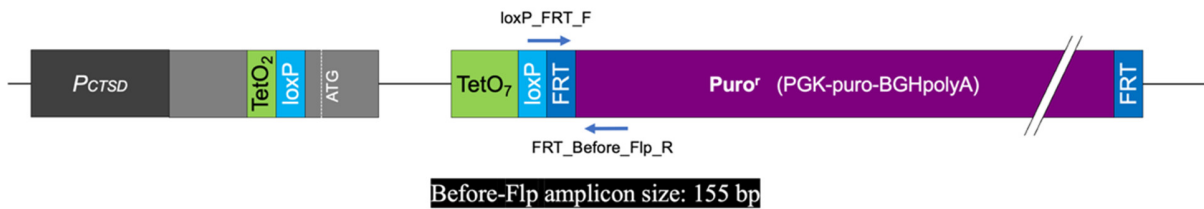

**After-Flp TRE-lox KI allele**

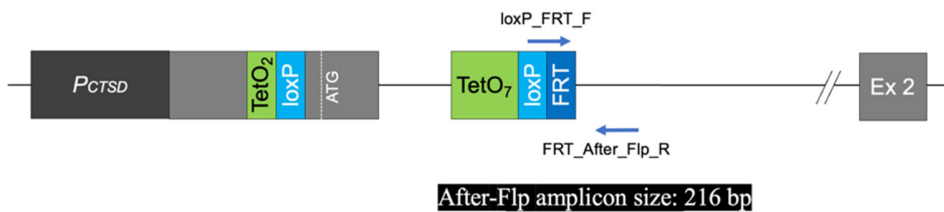

**b**

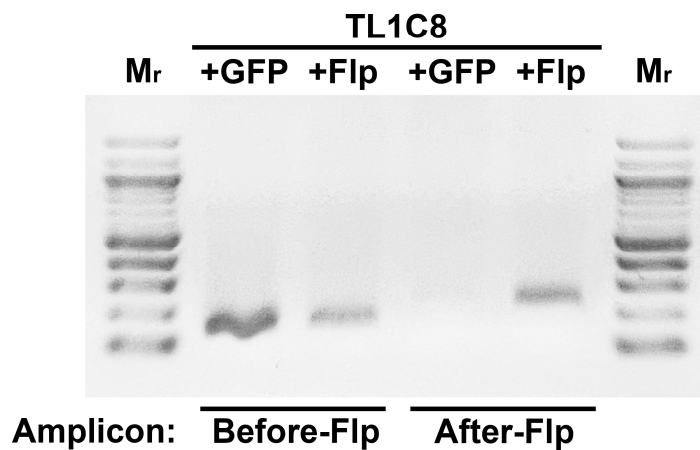

Note: The "After-Flp" amplicon is larger than the "Before-Flp" amplicon because the latter uses a different reverse primer located exclusively within the PuroR cassette.



**Supplementary Figure S7. Dox dose-response curves for stable clones TFR1B11 and TFR2E9.**

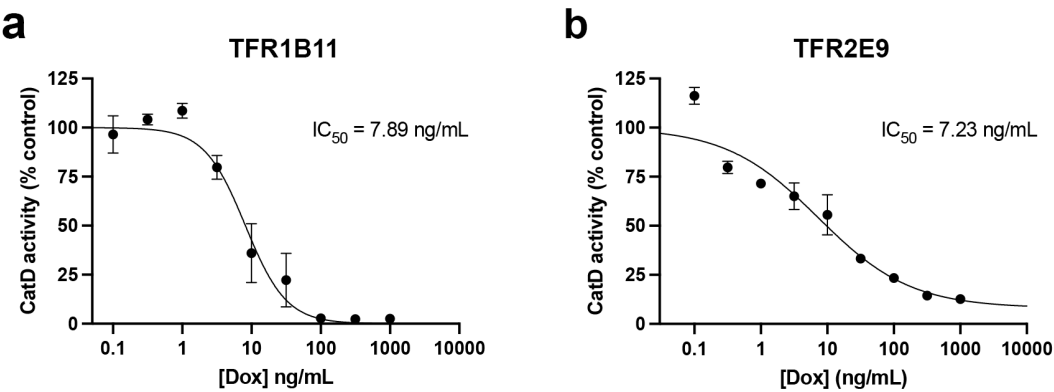

**Supplementary Figure S8. Time courses of CatD downregulation in clones TFR1B11 and TFR2E9 after addition of Dox (100 ng/mL).**

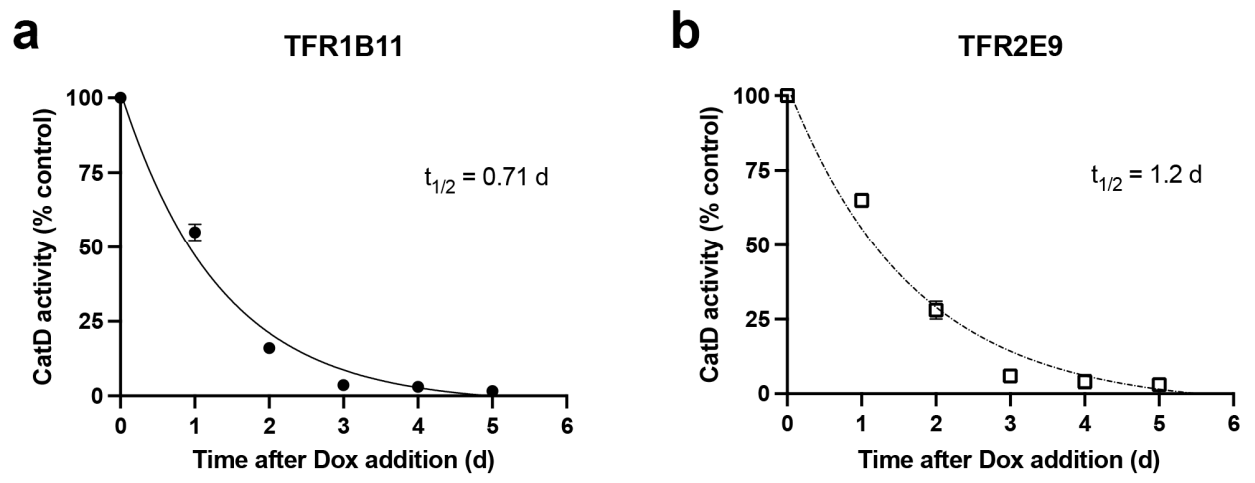

**Supplementary Figure S9. Effect of rtTR on CatD activity in the presence and absence of Dox (1000 ng/mL) in transient pools and stable clones of TL1C8-Flp cells.**

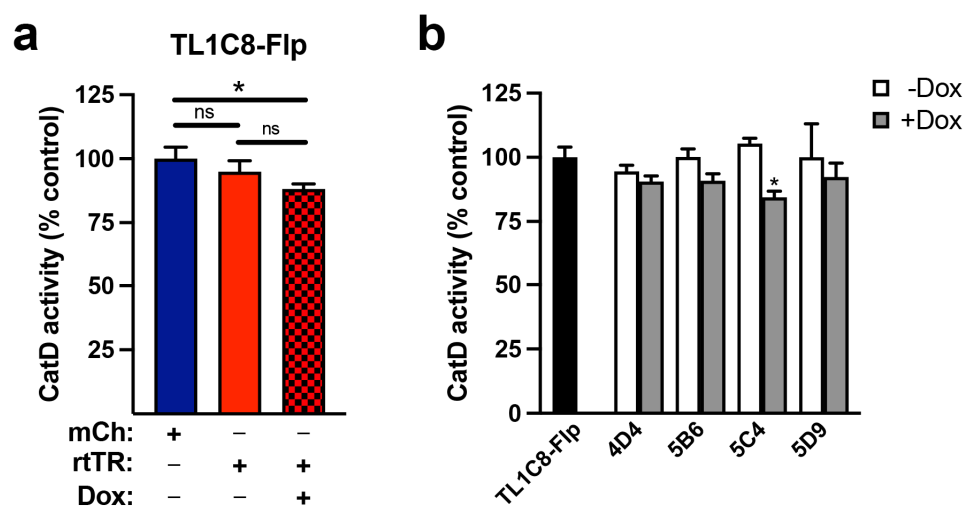

**Supplementary Figure S10. Steady-state CatD protein levels in MEFs vs. TFR1D7 cells and in response to Dox addition and withdrawal, using CatD-KO line C1C5 as a control.**

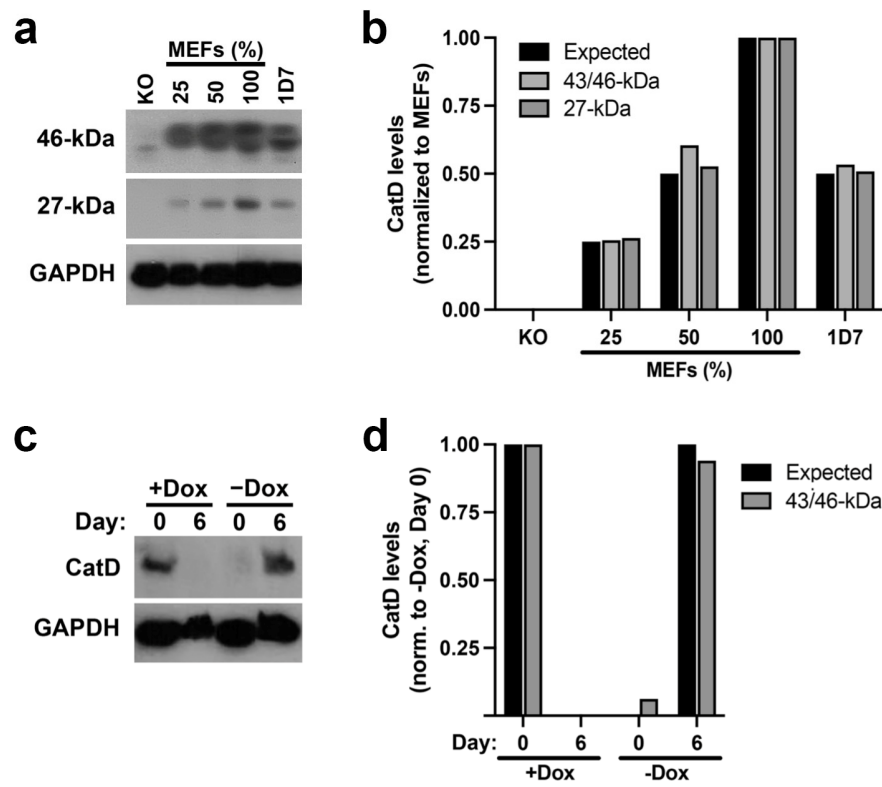

**Table S1. Primers used in this study.**

| Primer name                 | Sequence                                                                         | Purpose                                                                                         |
|-----------------------------|----------------------------------------------------------------------------------|-------------------------------------------------------------------------------------------------|
| gRNA1_top                   | CACCGGGGAGTCTTCATGGTCGCGG                                                        | gRNA1 cloned into px330A-1x2                                                                    |
| gRNA1_bottom                | AAACCCGCGACCATGAAGACTCCCC                                                        | "                                                                                               |
| gRNA2_top                   | CACCGACCTGGAGTGCCGCGTGCTC                                                        | gRNA2 cloned into px330S-2, then px330A-1x2                                                     |
| gRNA2_bottom                | AAACGAGCACGCGGCACTCCAGGTC                                                        | "                                                                                               |
| Vector_TetO2_F              | GTCCAGTGTGGTGGGAATTCAGCAGAGCtCTCCCTATC                                           | cloning of TetO2 for TRE-Lox KI template                                                        |
| TetO2_R                     | CGTATAGGATACTTTATACGAAGTTATCGACGATCTCTACTGAT                                     | cloning of TetO2/LoxP sequence for KI template                                                  |
| mCTSD_loxP-Ex1_F            | CGTATAAAGTATCCTATACGAAGTTATaGCCGCGACCATGAAGACTCC                                 | cloning of LoxP/mCTSD region for KI template                                                    |
| mCTSD_3G_In1-2_R            | GGAGTAACTCGAGTGAAGACGCGGCACTCCAGGTGACGAG                                         | cloning of mCTSD region/TRE3G for KI template                                                   |
| TRE3G_F                     | CGTCTTCACTCGAGTTTACTCC                                                           | cloning of TRE3G for KI template                                                                |
| TRE3G_R                     | CGACTAGTTATTACTACATAACTTCGTATAGGATACTTTATACGAAGTTATCTACCTCGACATACGTTCTC          | cloning of TRE3G/LoxP for KI template                                                           |
| LoxP_FRT_F                  | CGAAGTTATGTAGTAATAACTAGTCGAAGTTCCTATTC                                           | cloning of LoxP/FRT-flanked Puro <sup>r</sup> for KI template/verification of Flp recombination |
| Vector_FRT_R                | CCGCCACTGTGCTGGATATCAAAATGGCGCGCCGAAGTTCC                                        | cloning of FRT-flanked Puro <sup>r</sup> for KI template                                        |
| 5'HA_mCTSD_TRE-Lox_KI_F     | C*T*ATAAGCCGGCGACCTCTGGCTTTAAGCTTTGCTCTCTTCGGGCCGC<br>CGCAAGCAGAGCTCTCCCTATCAGTG | PCR amplifying TRE-Lox KI insert from template (asterisks denote phosphorothioate bonds)        |
| 3'HA_mCTSD_TRE-Lox_KI_R     | G*A*CCCTGAGGAAGGCTGCGCTGGGTGCACAGGTGCATTCCAGCAGG<br>GCCGAAATGGCGCGCCGAAGTTCC     | "                                                                                               |
| mCTSD_WT_prom_F             | GCGTCATCCTGCCTATAAGCCGGCG                                                        | genotyping of WT vs KI vs NHEJ mCTSD alleles/<br>verification of Cre recombination              |
| mCTSD_WT_2R                 | GTCTCACGTGACCCGTTGAGG                                                            | "                                                                                               |
| mCTSD_TRE-Lox_2R            | AACTCGAGTGAAGACGCGGCAC                                                           | "                                                                                               |
| FRT_Before_Flp_R            | AGCGCATGCTCCAGACTGCC                                                             | verification of Flp recombination                                                               |
| FRT_After_Flp_R             | CCTACTGTACCCTCCTGTTG                                                             | "                                                                                               |
| mCTSD_KI_Cre_verification_R | CTTCGACTAGTTATTACTACATAACTTCG                                                    | verification of Cre recombination                                                               |
| plCN_KOZ_rtTR(V16)_F        | CTTAATACGACTCACTATAGGCTAGCCGCCACCATGTCTAGACTGGACA<br>AGAGC                       | cloning of rtTR(V9I)/KRAB into plCherryNeo                                                      |
| KRAB_rtTR(V16)_R            | CGAGCCGCTTTGCGACTTTAGCTG                                                         | "                                                                                               |
| rtTR(V16)_KRAB_F            | CAGCTAAAGTGCGAAAGCGGCTCGCCAAAAAAGAAGAGAAAGGTCG                                   | "                                                                                               |
| IRES_KRAB_only_R            | CTCTAGAGGTACCACGCGTGAATTACACCAGCCAGGGCTCTTCTCC                                   | "                                                                                               |
| DEL_KRAB_69oC_F             | TAATTCACGCGTGGTACCTCTAGAG                                                        | deletion of KRAB from rtTRKRAB in plCherryNeo                                                   |
| DEL_KRAB_69oC_R             | GCCGCTTTCGCACTTTAGCTGTTTC                                                        | "                                                                                               |
